# Supplementary material for: Genomic Evolution of Breast Cancer Metastasis and Relapse
Source: PubMed Central journal article supplement (PMC5559645; doi:10.1016/j.ccell.2017.07.005), 2017-08-14
Supplement: mmc1.pdf [file mmc1.pdf]

## Supplemental Information

### Genomic Evolution of Breast Cancer

#### Metastasis and Relapse

Lucy R. Yates, Stian Knappskog, David Wedge, James H.R. Farmery, Santiago Gonzalez, Inigo Martincorena, Ludmil B. Alexandrov, Peter Van Loo, Hans Kristian Haugland, Peer Kaare Lilleng, Gunes Gundem, Moritz Gerstung, Elli Pappaemmanuil, Patrycja Gazinska, Shriram G. Bhosle, David Jones, Keiran Raine, Laura Mudie, Calli Latimer, Elinor Sawyer, Christine Desmedt, Christos Sotiriou, Michael R. Stratton, Anieta M. Sieuwerts, Andy G. Lynch, John W. Martens, Andrea L. Richardson, Andrew Tutt, Per Eystein Lønning, and Peter J. Campbell

**A**

PD9195: a = primary, c = local relapse in lymph node, d = local relapse in breast

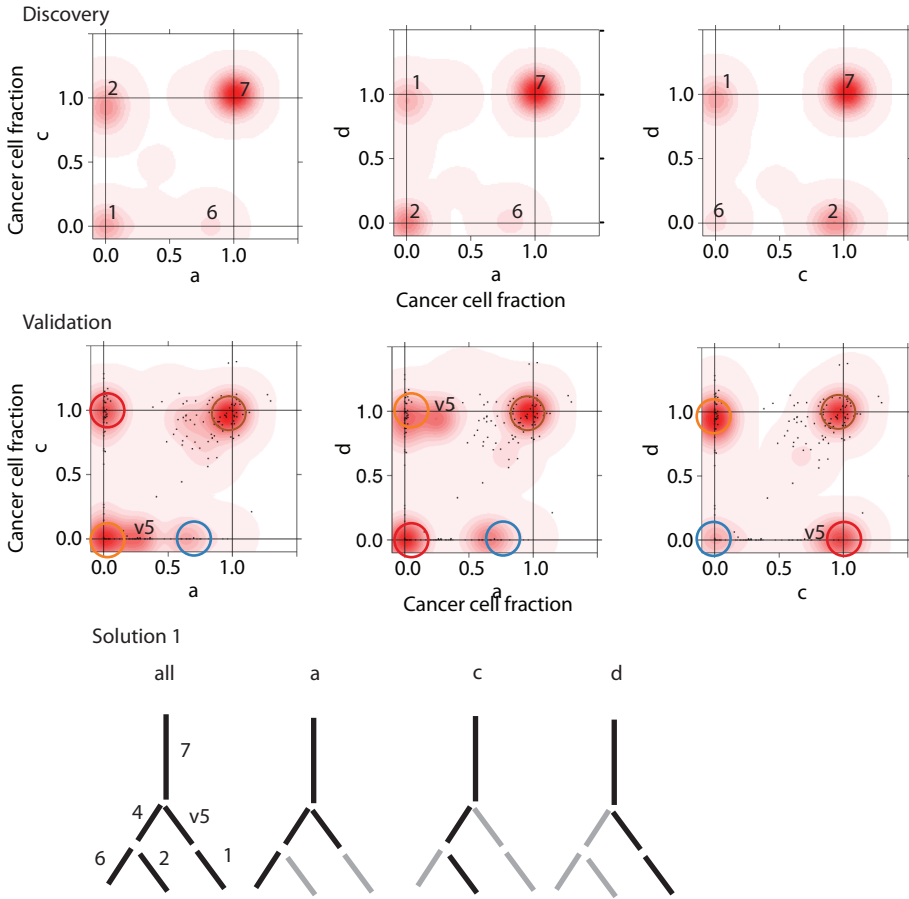

No. mutations[CI] (% of all mutations)

- v ● Cluster 1 : 790 subs [786,793] (20%)
- v ● Cluster 2 : 968 subs [964,973] (24%)
- Cluster 3 : 12 subs [7,17] (0%)
- Cluster 4 : 50 subs [45,55] (1%)
- Cluster 5 : 7 subs [3,12] (0%)
- v ● Cluster 6 : 200 subs [197,204] (5%)
- v ● Cluster 7 : 1996 subs [1989,2003] (50%)

Add validation cluster v5: 30 subs

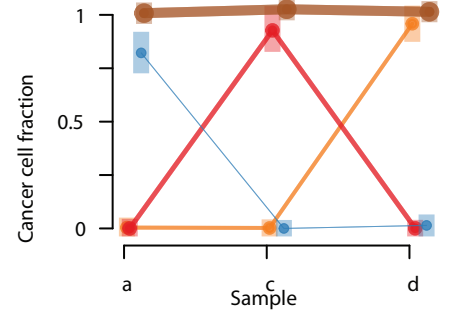

**B**

PD11460: a = late scalp metastasis, c = axillary lymph node (synchronous to primary), d = primary tumour

Discovery

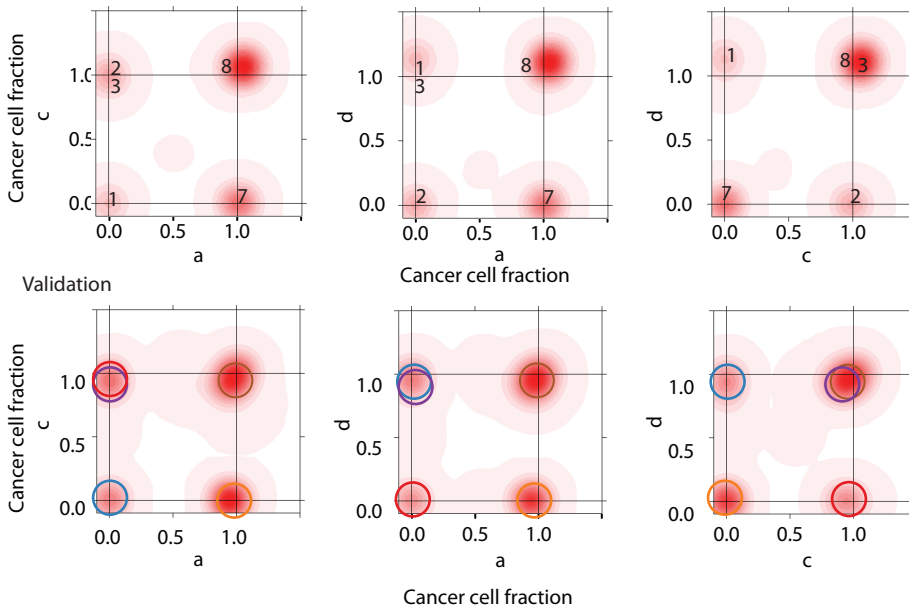

No. mutations[CI] (% of all mutations)

- v ● Cluster 1 : 864 subs [859,869] (10%)
- v ● Cluster 2 : 1,166 subs [1160,1172] (14%)
- v ● Cluster 3 : 171 subs [163,180] (2%)
- Cluster 4 : 19 subs [13,25] (0%)
- Cluster 5 : 64 subs [55,73] (1%)
- Cluster 6 : 114 subs [106,123] (1%)
- v ● Cluster 7 : 2,068 subs [2060,2074] (25%)
- v ● Cluster 8 : 3,891 subs [3878,3905] (47%)

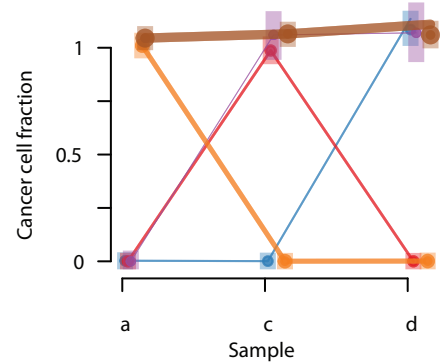

**C**

PD2423: a = primary tumor, c = distant metastasis (subcutaneous tissue of thigh)

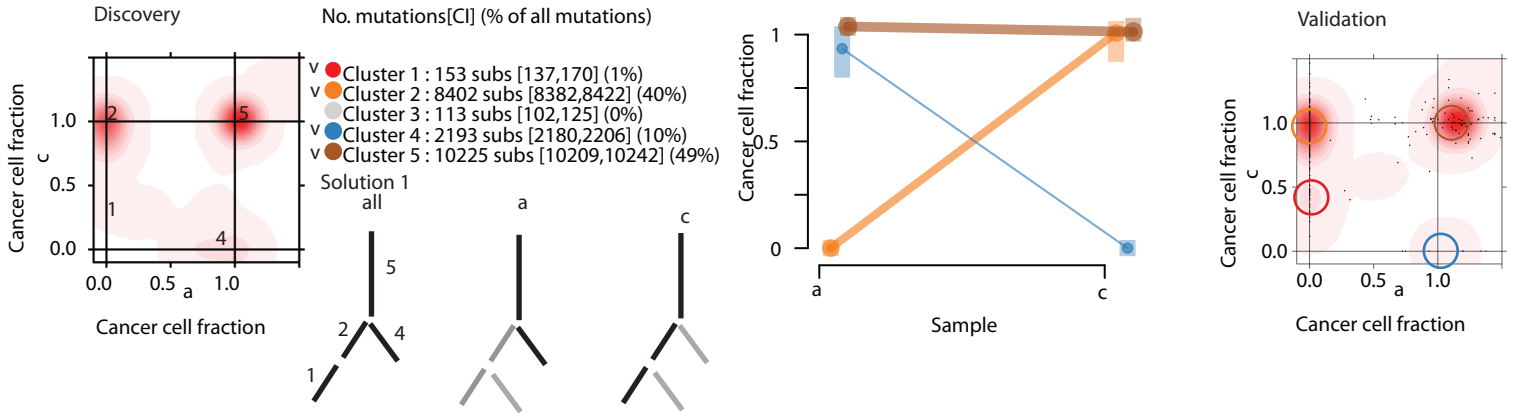**D**

PD13596: a = primary tumor, c = liver metastasis

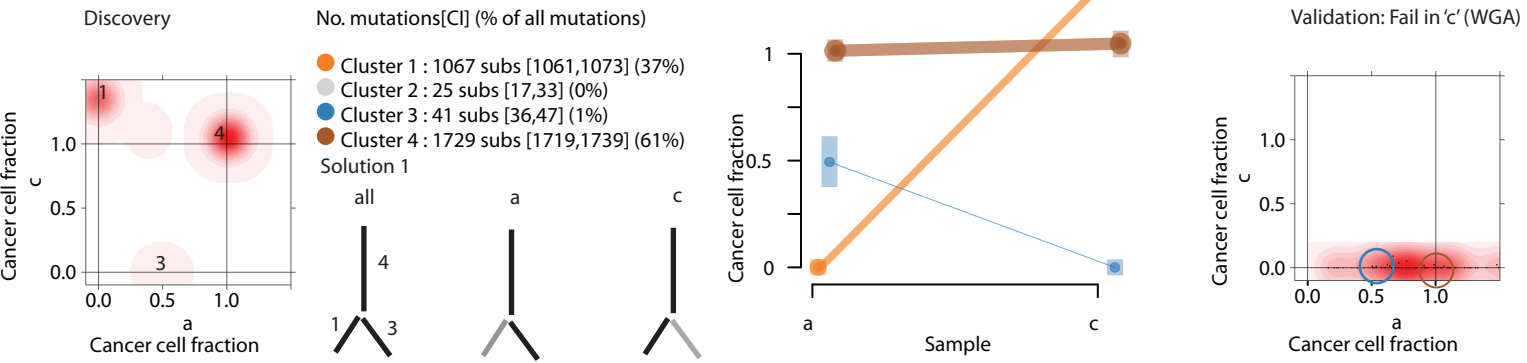**E**

PD9193: a = primary tumor; c = distant lymph node metastasis

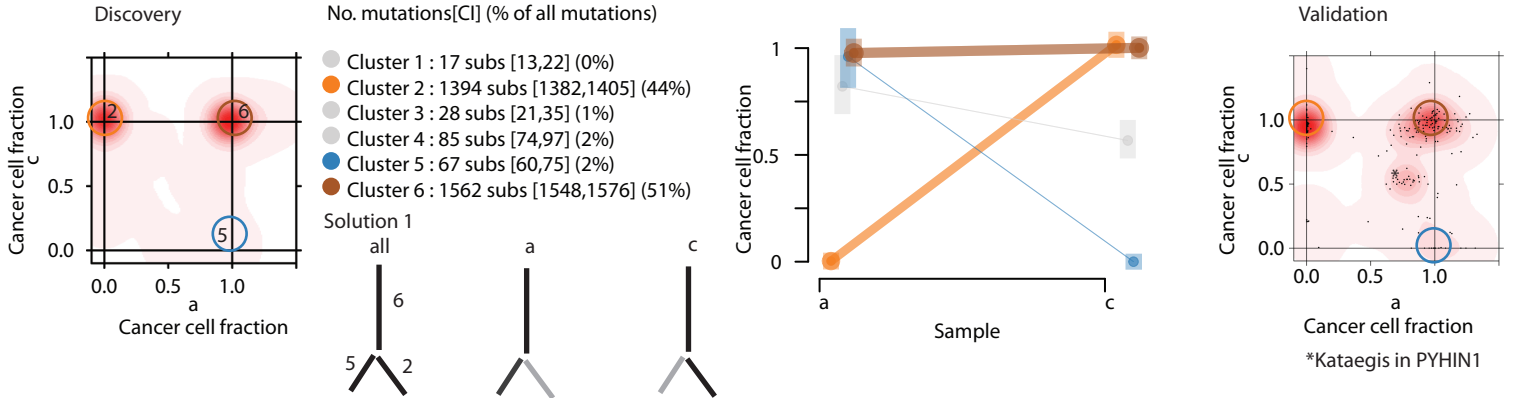**F**

PD8948: d = left breast; e = right breast

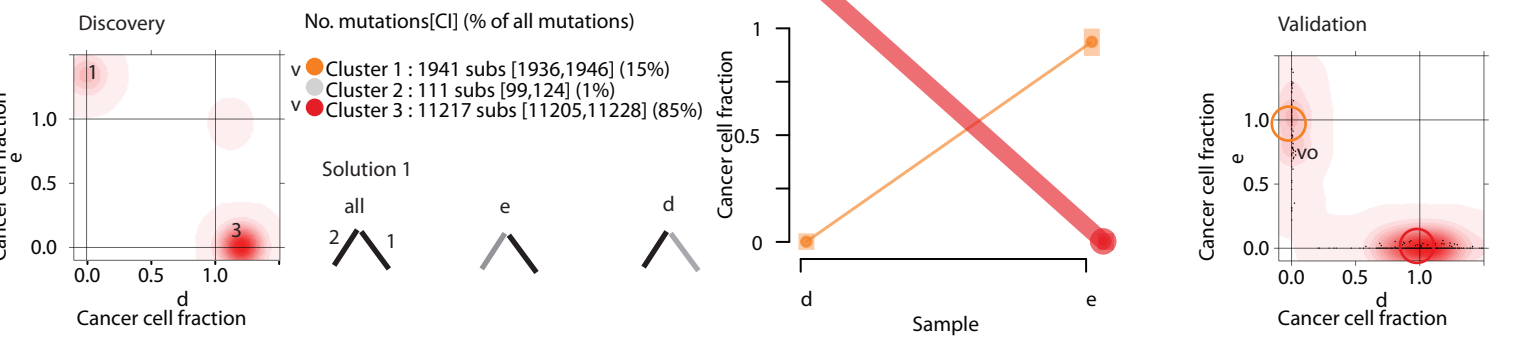**G**

PD5956: a = primary tumor; c = synchronous axillary lymph node metastasis

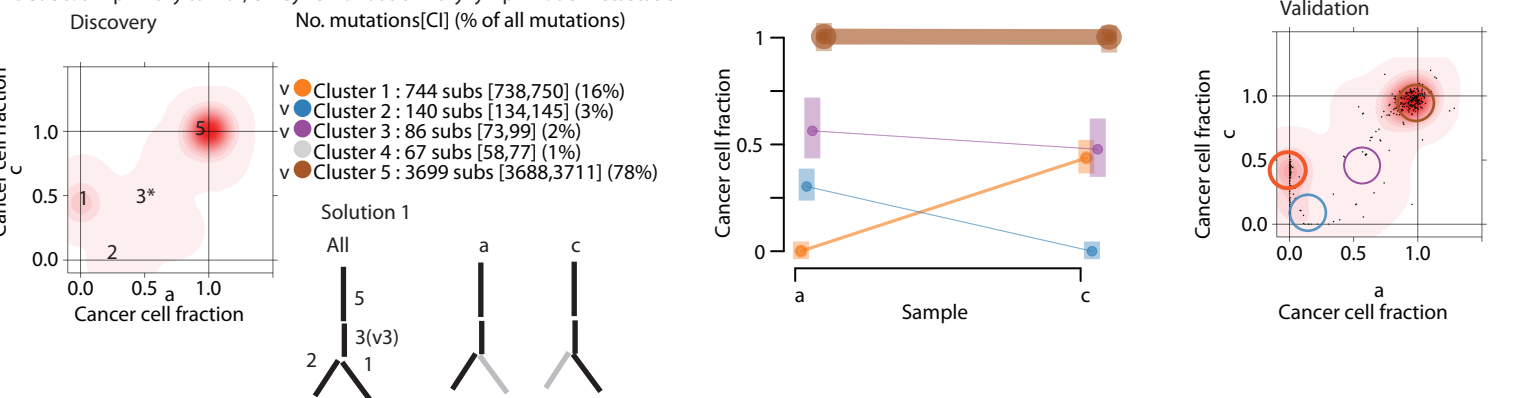

H

PD9194: a = primary tumour, c = local relapse (breast).

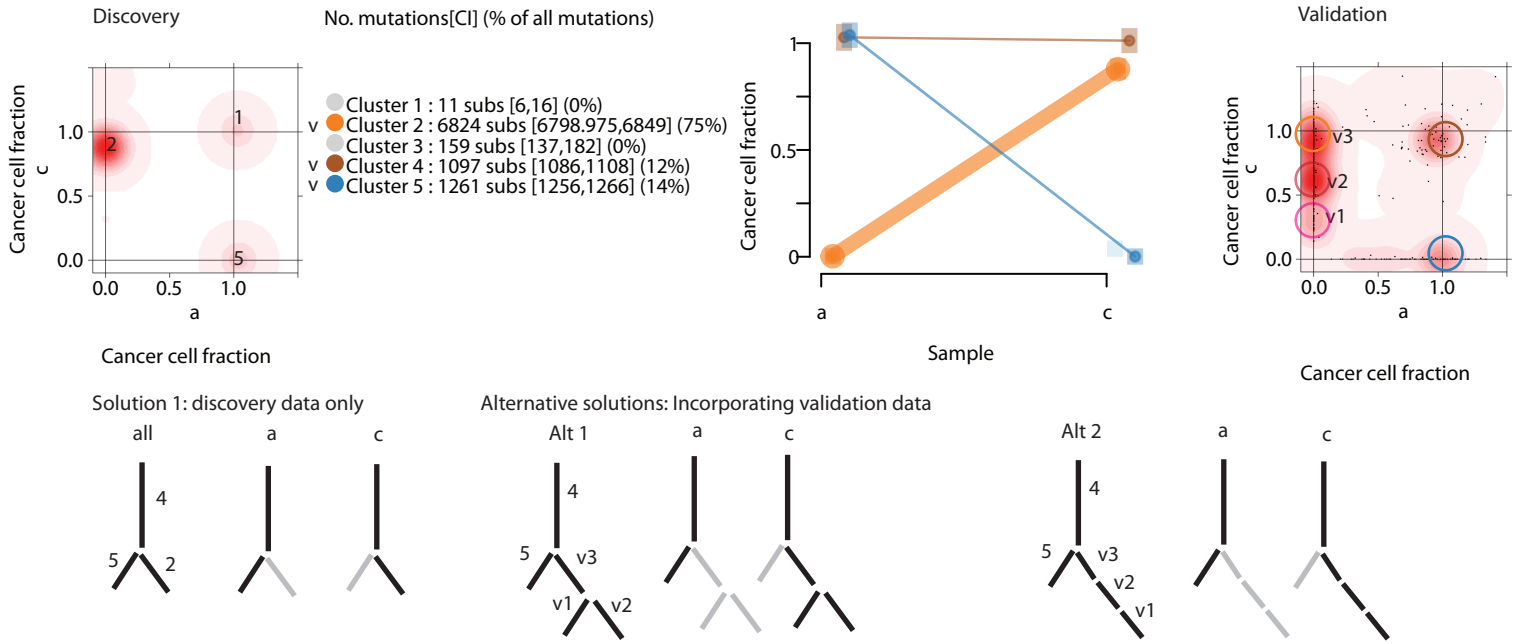

I

PD4252: a = primary tumor; c = synchronous lymph node metastasis

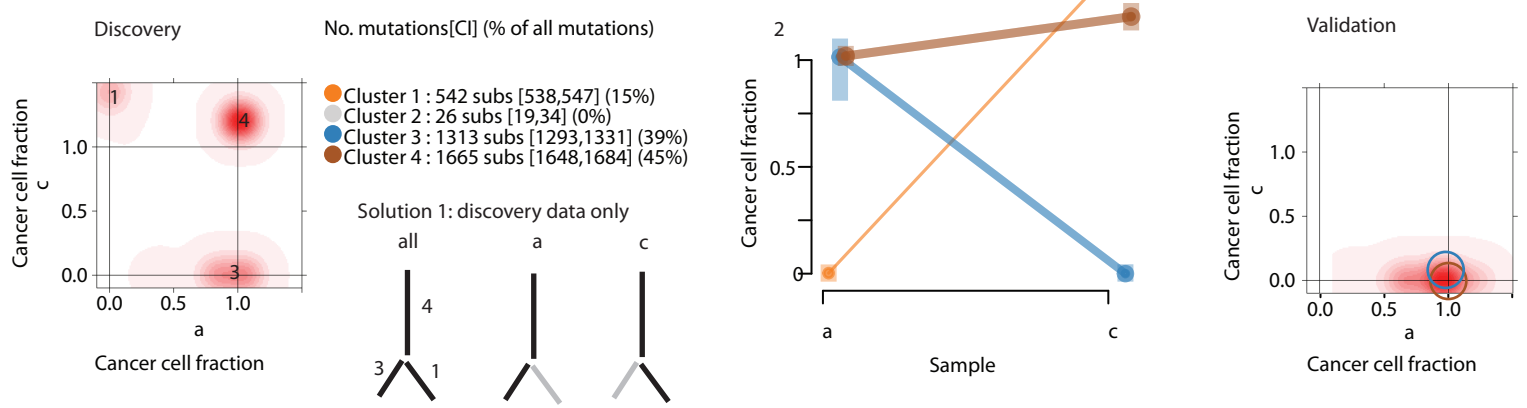

J

PD114780: a,d = primary tumor (2 separate foci in multi-focal cancer); e = synchronous axillary lymph node metastasis

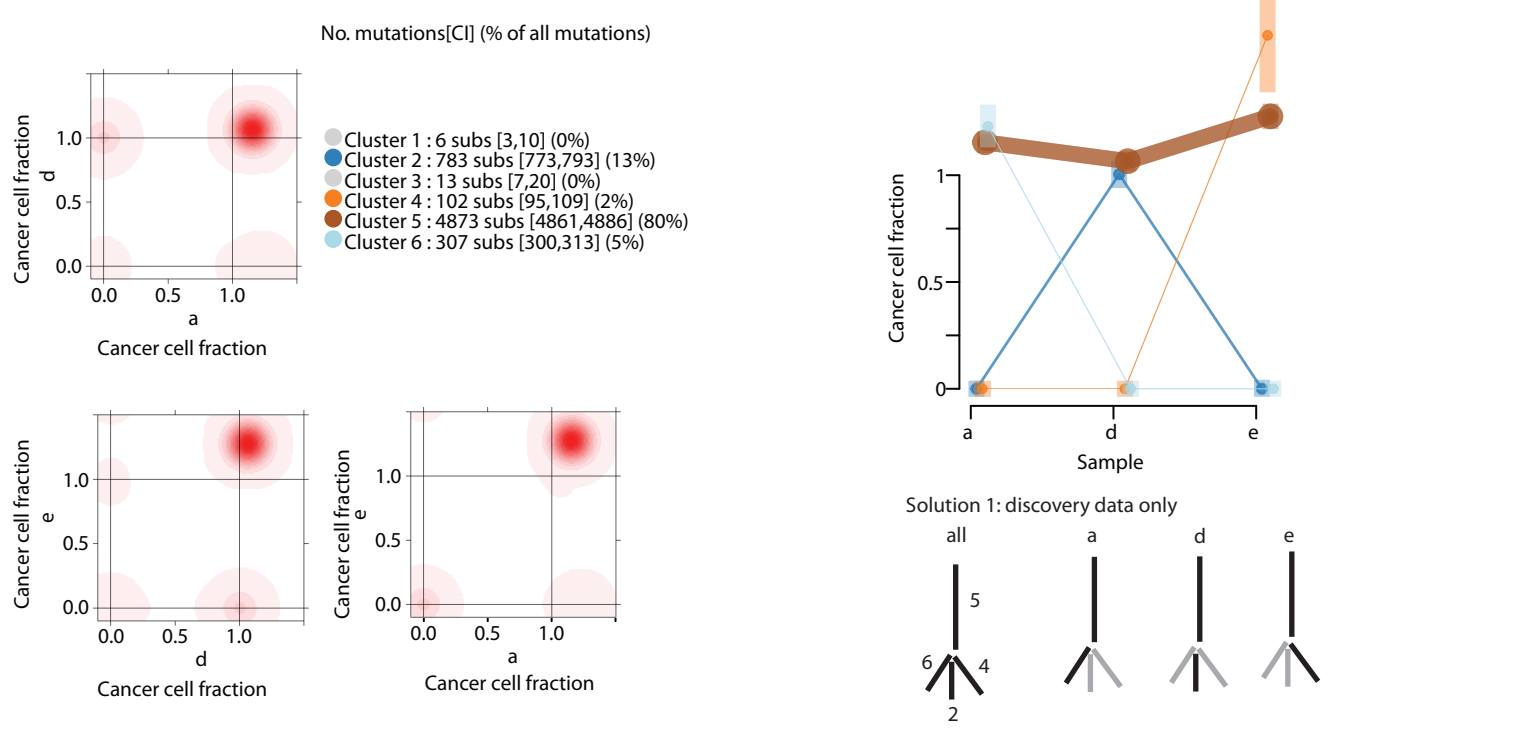

**K**

PD4820: a = primary tumor; c = synchronous axillary lymph node

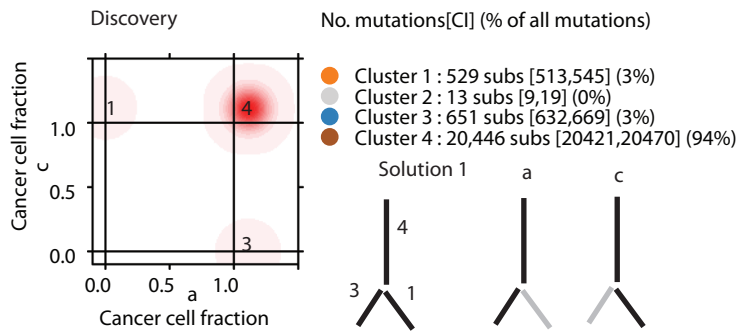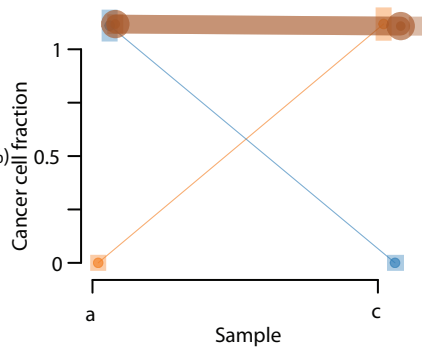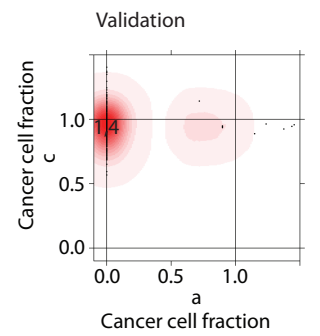

**L**

PD6728: b = primary tumor; c = synchronous axillary lymph node

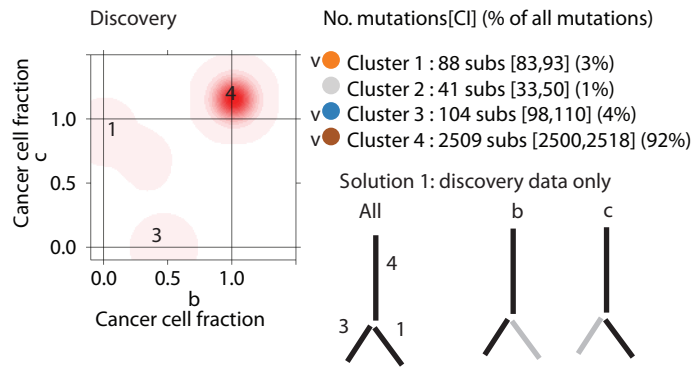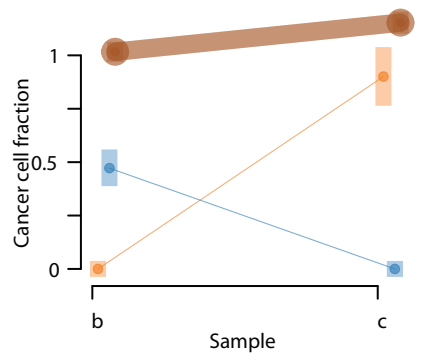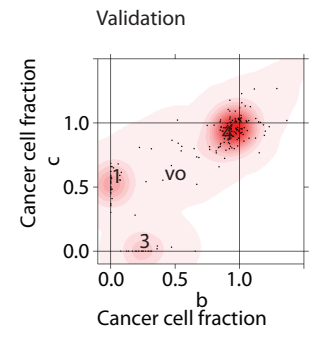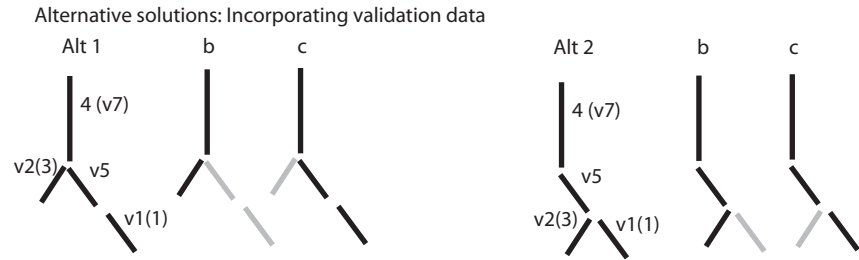

**M**

PD4248: a = primary tumor; c = synchronous axillary lymph node

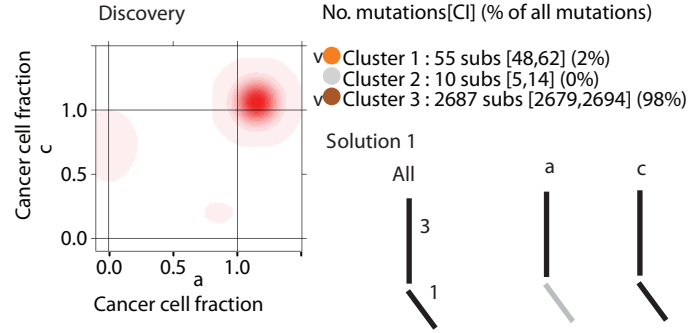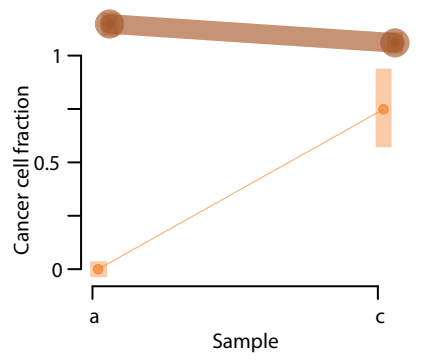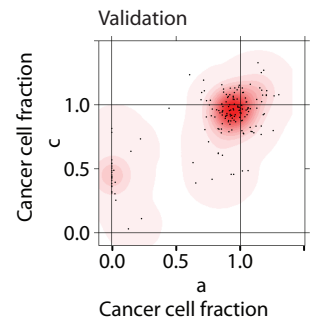

**N**

PD11459: c = primary tumor; a = synchronous axillary lymph node

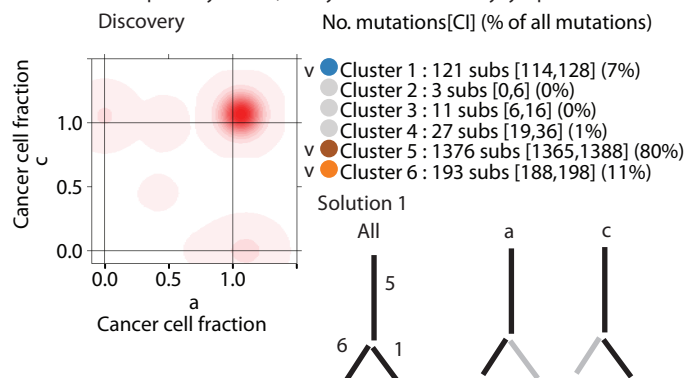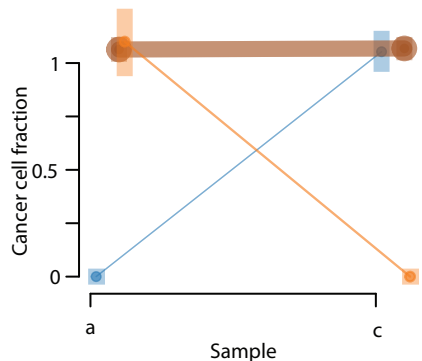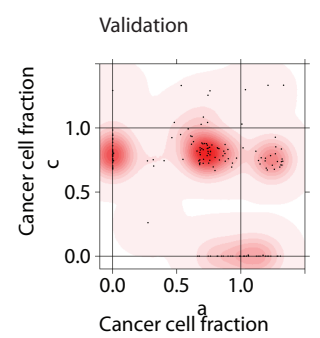

O

PD9771 : a, c = primary tumor, pre-chemotherapy; d = primary tumor, post-chemotherapy; e = lung metastasis.

Discovery

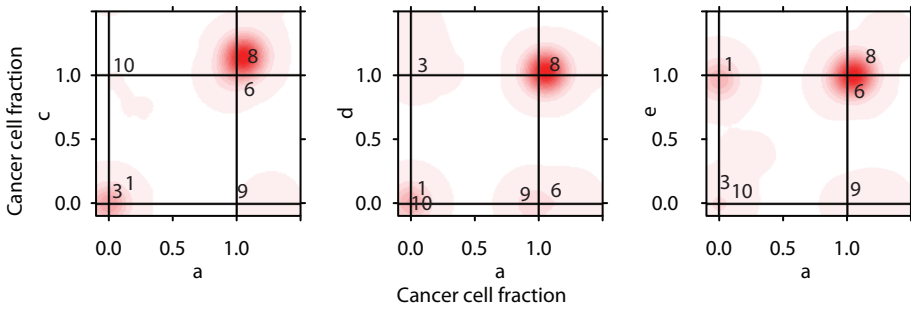

Validation

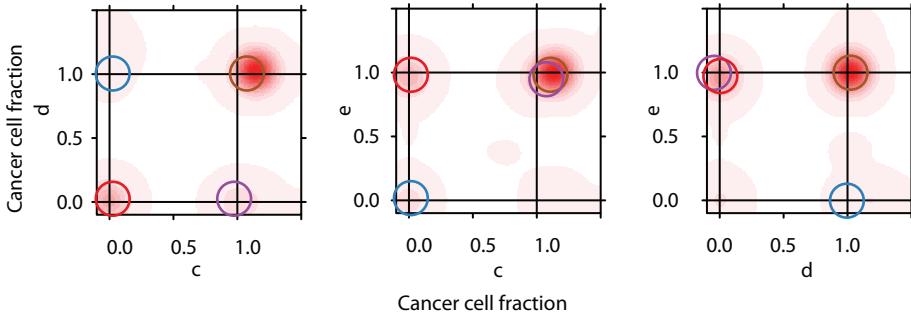

Solution 1

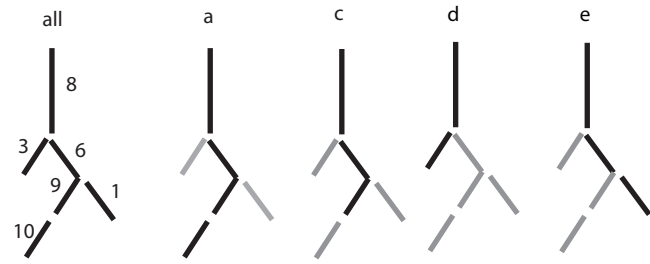

No. mutations[CI] (% of all mutations)

- vi Cluster 1 : 1366 subs [1352,1379] (18%)
- vi Cluster 2 : 71 subs [60,81] (1%)
- vi Cluster 3 : 446 subs [440,452] (6%)
- vi Cluster 4 : 58 subs [45,70] (0%)
- vi Cluster 5 : 23 subs [15,31] (0%)
- vi Cluster 6 : 713 subs [686,738] (11%)
- vi Cluster 7 : 82 subs [76,89] (1%)
- vi Cluster 8 : 4537 subs [4510,4565] (58%)
- vi Cluster 9 : 208 subs [199,218] (3%)
- vi Cluster 10 : 135 subs [126,143] (2%)

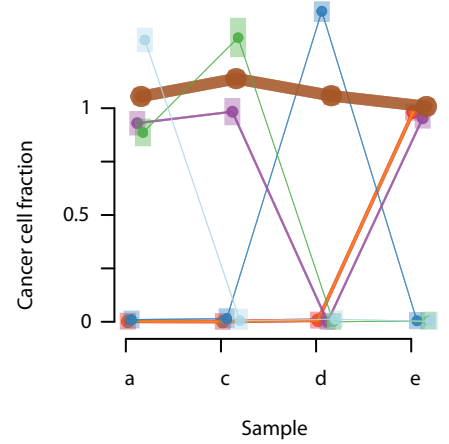

P

PD11461: a = local recurrence; c = primary tumor.

Discovery

No. mutations[CI] (% of all mutations)

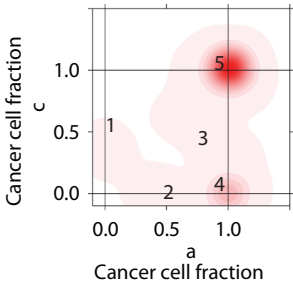

- v Cluster 1 : 77 subs [73,81] (2%)
- v Cluster 2 : 83 subs [74,93] (2%)
- v Cluster 3 : 91 subs [78,104] (2%)
- v Cluster 4 : 796 subs [783,808] (20%)
- v Cluster 5 : 2924 subs [2913,2935] (74%)

Solution 1

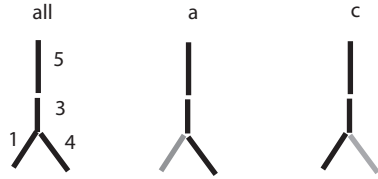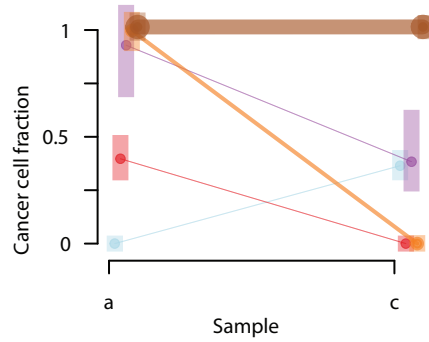

Validation subs

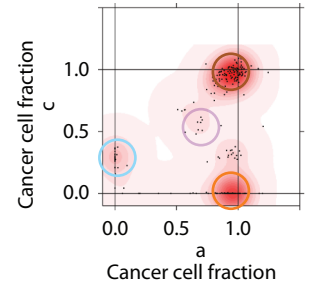

Q

PD11458 : a = distant lymph node metastasis; c = primary tumor.

Discovery

No. mutations[CI] (% of all mutations)

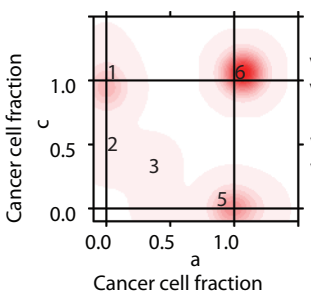

- v Cluster 1 : 2913 subs [2881,2944] (17%)
- v Cluster 2 : 488 subs [459,519] (2%)
- v Cluster 3 : 402 subs [378,425] (2%)
- v Cluster 4 : 192 subs [172,213] (1%)
- v Cluster 5 : 4602 subs [4580,4624] (26%)
- v Cluster 6 : 9130 subs [9108,9153.025] (51%)

Solution 1

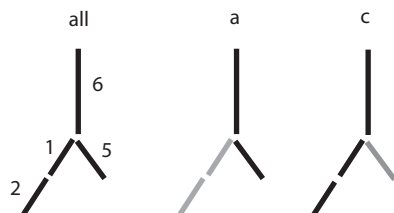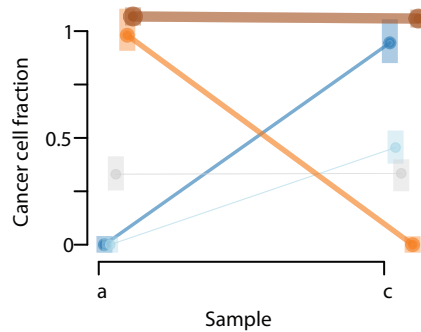

Validation

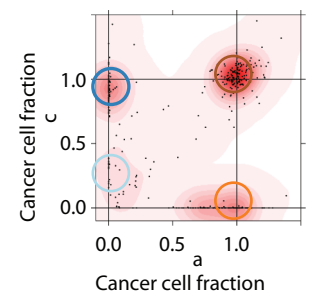

No alternative solution identified

**Figure S1, related to Figure 1. Phylogenetic Trees Derived from Whole Genome Data Describe the Evolution of 17 Relapsed or Metastatic Breast Cancers.**

(A–Q) Depiction of the approaches used to construct one of the 17 phylogenetic trees represented in Figure 1 using multi-sample genome-wide somatic substitution data. Each panel depicts to a single cancer and contains 3 elements including possible phylogenetic tree structures, mutation density plots and cancer cell fraction line plots. For each patient, density plots of cancer cell fractions were derived by applying a multi-dimensional Bayesian Dirichlet process to whole genome data (discovery) and independently to variants selected for inclusion in the high depth re-sequencing (validation) experiment (16/17 patients). The cancer cell fraction refers to the proportion of tumour cells within a sample, estimated to harbor that cluster of mutations. Within the discovery density plots each significant cluster (those containing 2% or greater of mutations) is annotated with a number that refers to the relevant mutation cluster as reported in the legend. The legend reports the number of mutations in each cluster and their 95% credible intervals (CI) and dictates the relative branch lengths of the phylogenetic trees reported in Figure 1. Across 13 cases, 45 out of 48 discovery clusters were independently identified through validation data clustering, demarcated as a 'v' in the legend and colored circles within the validation density plots. Additional clusters identified by the validation experiment, but not significant in the discovery experiment, are annotated by a 'v' within the density plot. For three individuals, validation pulldown failed on account of whole genome amplification (WGA) technical failure (D, I, K). Line-plots report the cancer cell fraction of each cluster in related samples and the 95% credible intervals are depicted as underlying translucent colored bars while the line thickness reflects the number of mutations. Tree structures are constructed by hierarchical ordering of mutation clusters following the 'pigeon-hole principle'. All tree solutions that are compatible with these data are presented. In each case the discovery data was consistent with a single solution and in 4 cases (A, C, L, H) an alternative solution was identified using additional information from high depth re-sequencing (validation) data.

A

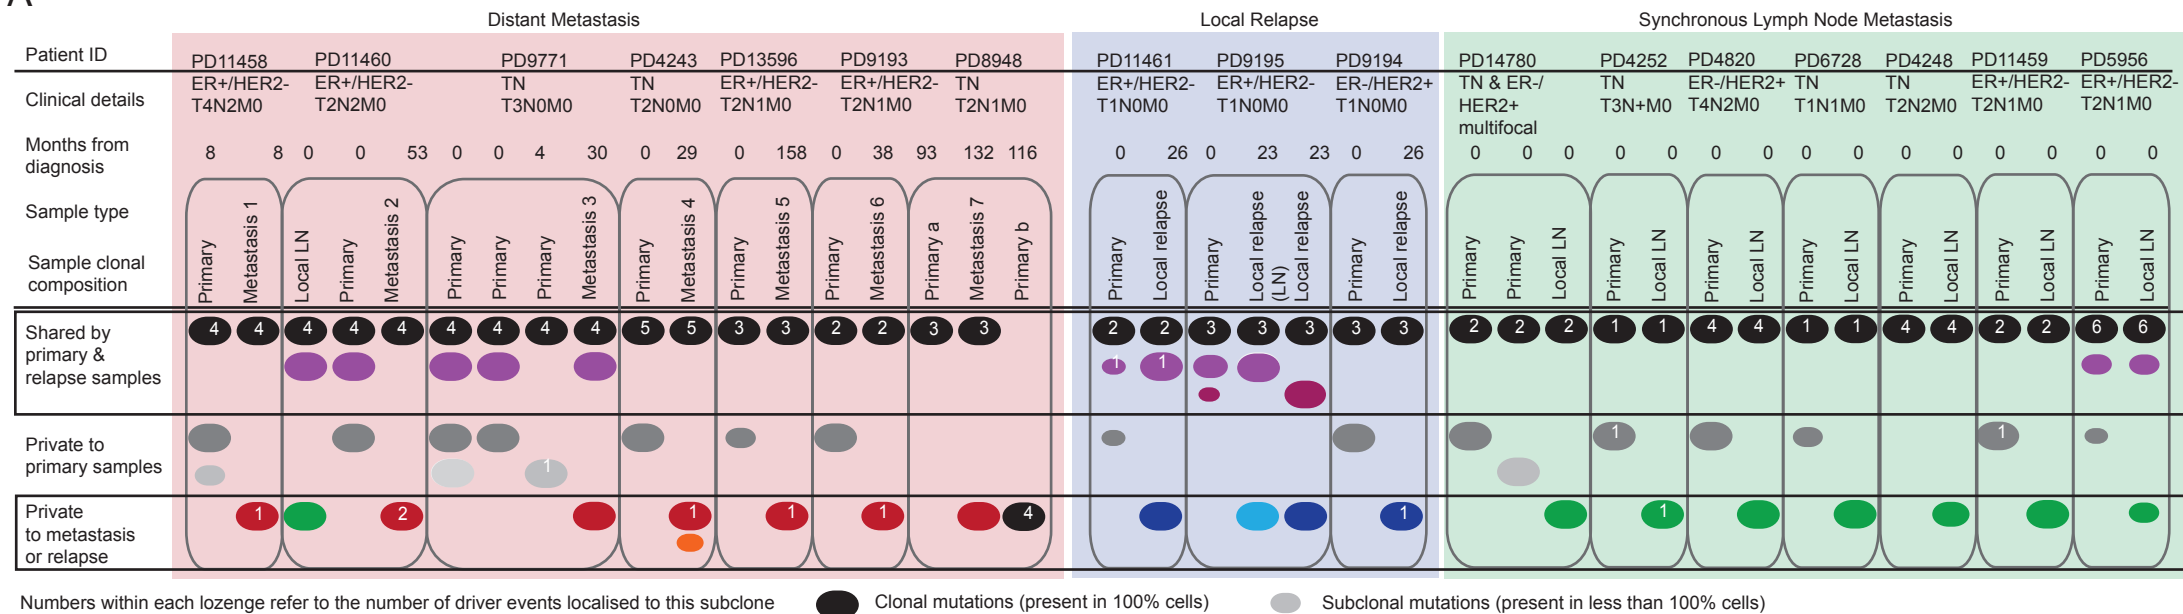

B

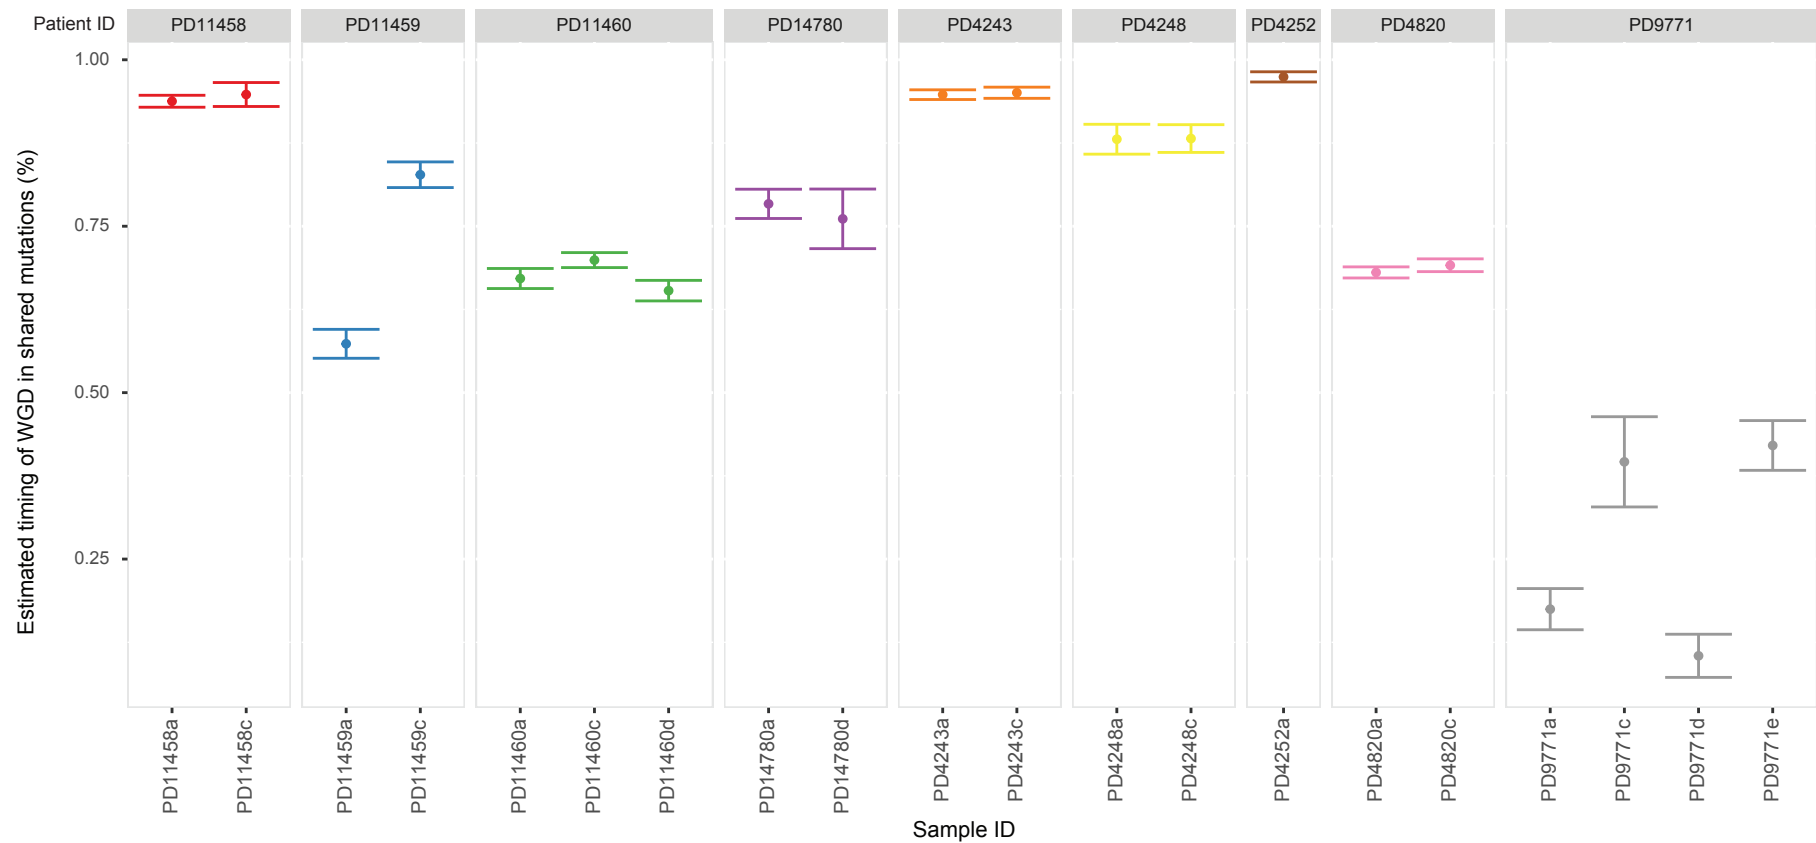



**Figure S2, Related to Figure 1. Subclonal Structure and Whole-Genome Duplication Timing During the Evolution of 17 Breast Cancers.**

(A) Subclonal composition of 40 primary and relapse tumour samples from 17 patients were inferred from nd-Dirichlet clustering of genome-wide somatic substitution data. The subclonal composition of each tumour sample is presented within a single column and reveals that subclones can be present in different proportions in different samples from the same cancer. The proportion of each lozenge blocked with color reflects the proportion of cells in that sample that contain the mutations that constitute the same color branch of the relevant phylogenetic tree in Figure 1. Black lozenges represent clonal mutations, i.e. those present in 100% of cancer cells. The number of identified driver events within each subclone (branch) is reported in the relevant lozenge.

(B) Whole genome duplication timing estimated from genome-wide somatic substitution data from 20 tumour samples from 9 breast cancers where a whole genome duplication event had occurred. Dots correspond to the observed values and the error bars were generated through bootstrapping estimates of the number of observed mutations. The duplication estimate reflects the point in molecular time, within the phylogenetic tree trunk that the duplication event occurred. For each cancer duplication precedes primary-relapse clone divergence. Sample PD8948 is excluded due to technical limitations as discussed in Figure S3.

**A**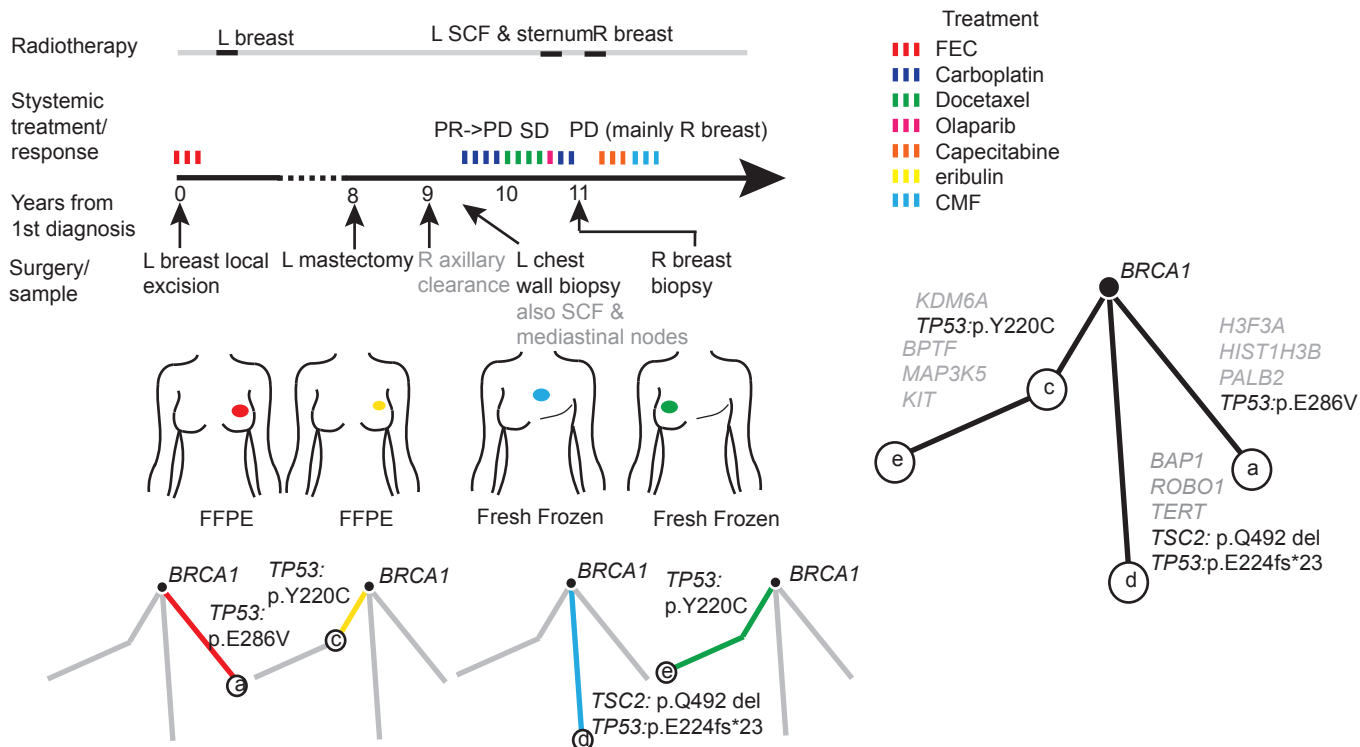**B**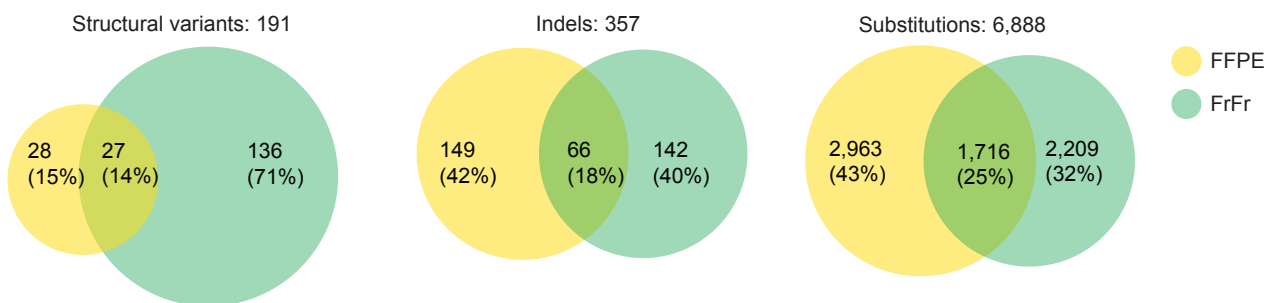**C**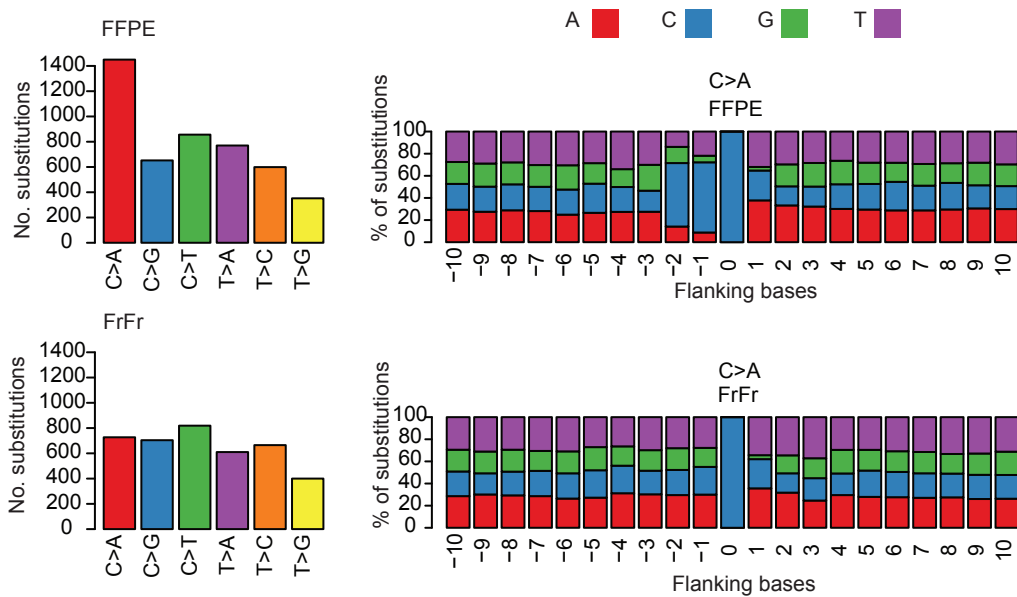**D**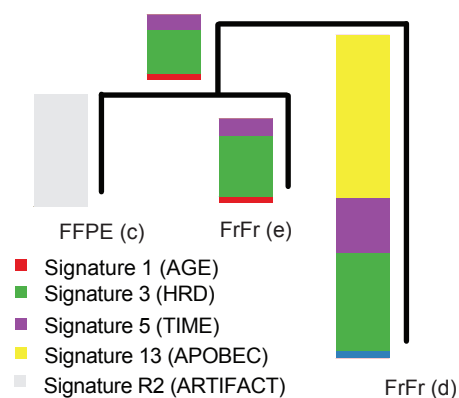

**Figure S3, related to Figure 2. Genome-Wide Sequencing of Four Samples from a Single Patient Reveals Serial Unrelated Cancers.**

(A) Analysis of genomic sequence data reveals that multiple breast tumour samples in a known *BRCA1* mutation carrier (case PD8948) were derived from three different cancers. The clinical history in relation to the acquisition of the four sequenced cancer samples is presented. The nature of each sample – either fresh frozen (FrFr) or formalin fixed paraffin embedded (FFPE) is specified. Treatments are annotated in relation to time and treatment responses reported (PR = partial response, PD = progressive disease, SD = stable disease). A mock phylogenetic tree structure was determined based on non-synonymous point mutations identified within the scope of the 365 gene targeted panel across all four of the sequenced samples. Mutated genes annotate relevant tree branches where black font indicates a driver mutation. For each sample the phylogenetic tree branches (subclones) detected in that sample are highlighted in the same colour on the mock tree below. The tree derived from whole genome sequence data that was available for three of the samples (a, c and e) features in Figure 1.

(B-D) Genome-wide mutational analysis of two samples (PD8948c and PD8948e) thought to be clonally related based on targeted capture (A). One sample (PD8948c) is derived from formalin fixed paraffin embedded (FFPE) tissue and the other (PD8948e) from fresh frozen tissue (FrFr). (B) Venn diagrams demonstrate a significant overlap amongst all mutation types confirming that these samples are clonally related. As expected the sample obtained 3 years later (PD8948e) contains a significant private mutation burden. Unexpectedly, the earlier sample (PD8948c) contained a similar private mutation burden raising the suspicion of a sequencing artifact. (C) The substitution (base change) spectra in the two samples is presented (left), and demonstrates a predominance of C>A base changes. The flanking sequence 10 base pairs either side of each C>A mutation in the FFPE and related fresh frozen samples are presented (right) and show an enrichment of C at the -1 and -2 genomic positions. (D) Phylogenetic tree construction of this sample and formal mutational signature analysis using a non-negative matrix factorization approach assigned all mutations private to the FFPE sample as deriving from a likely sequencing artifact similar to that previously reported as arising as a consequence of oxidation during exome library preparation. Mutation signatures shared by the two samples were consistent with those private to the relapse (FrFr) sample being dominated by a signature of homologous recombination deficiency (HRD) as expected in this patient with a germline *BRCA1* mutation.

**A**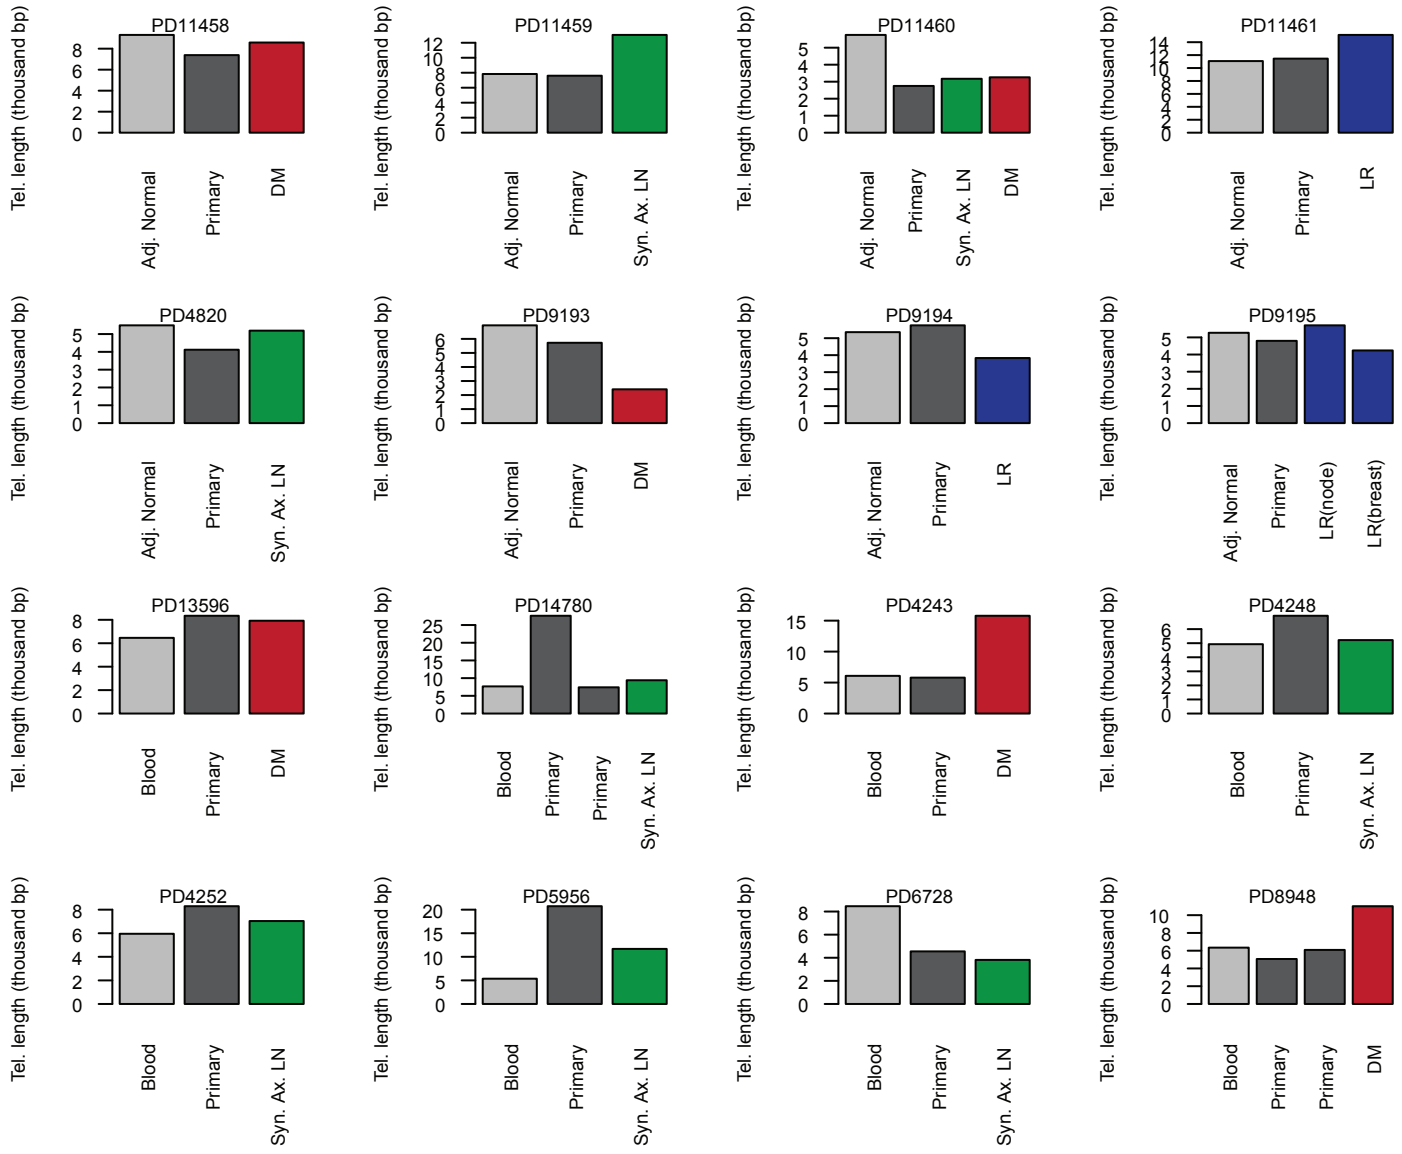**B**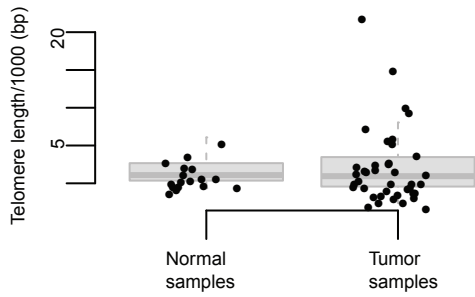**C**

- Distant metastasis
- Local relapse
- Synchronous Ax. LN
- Primary tumor
- Primary tumor (post-chemo)

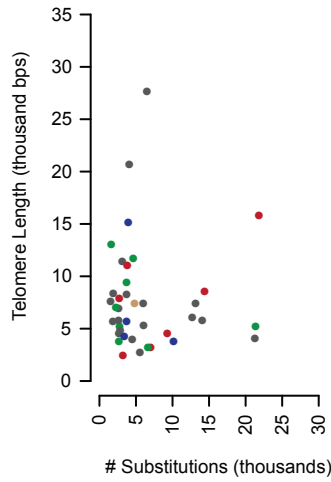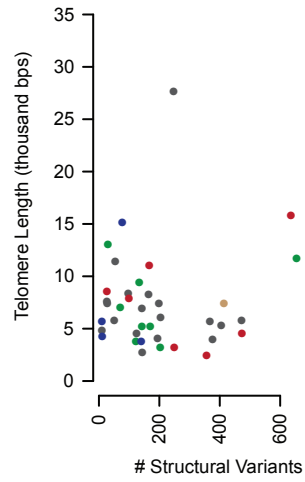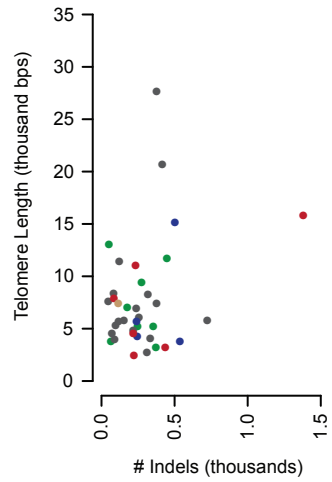

**Figure S4, related to Figure 3. Telomere Lengths of 57 Breast Cancer and Matched Normal Samples from 17 Individuals.**

(A) Barplots indicate telomere lengths estimated for all sequenced samples from an individual and include either a blood or adjacent normal breast tissue (Adj. Normal) derived germline sample (light grey bars), in addition to tumour samples from primary tumour(s) (dark grey bars) and relapsed or metastatic sample(s) where LR = local relapse (blue bars), DM = distant metastasis (red bars), Syn. Ax. LN = synchronous axillary lymph node samples (green bars).

(B) Boxplots of telomere lengths in normal and tumour samples where the box represents the inter-quartile range (IQR) dissected by the median, whiskers represent the maximum and minimum range of the data that does not exceed 1.5x the IQR while any outlier data points extend beyond this. Bp = Base pairs.

(C) Scatterplots relate telomere lengths to the number of somatic substitutions within 39 tumour samples from 17 patients (excludes FFPE derived sample PD8948c as this estimate is thought to be inaccurate due to technical artifacts introduced by the fixation method).

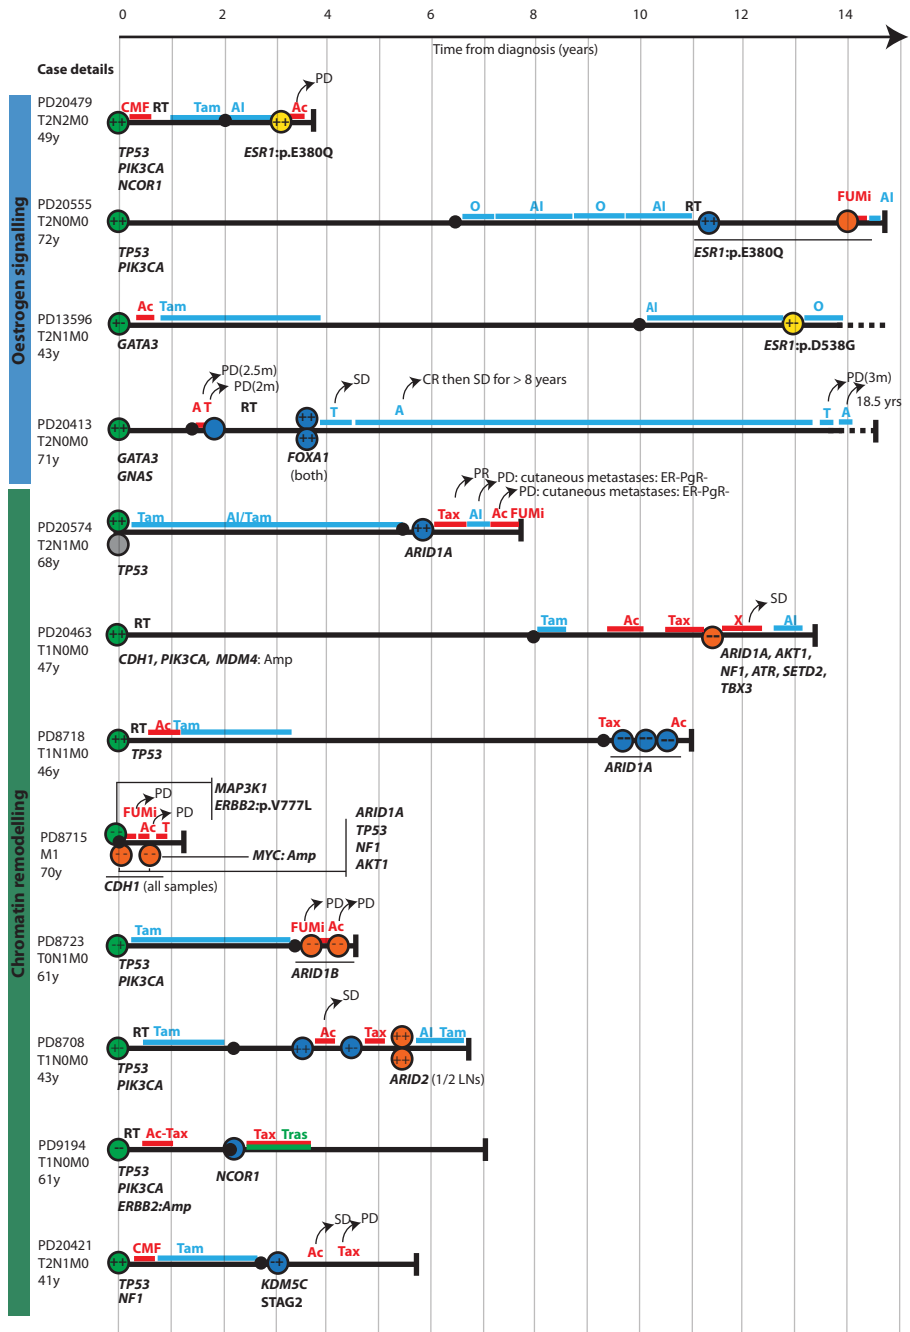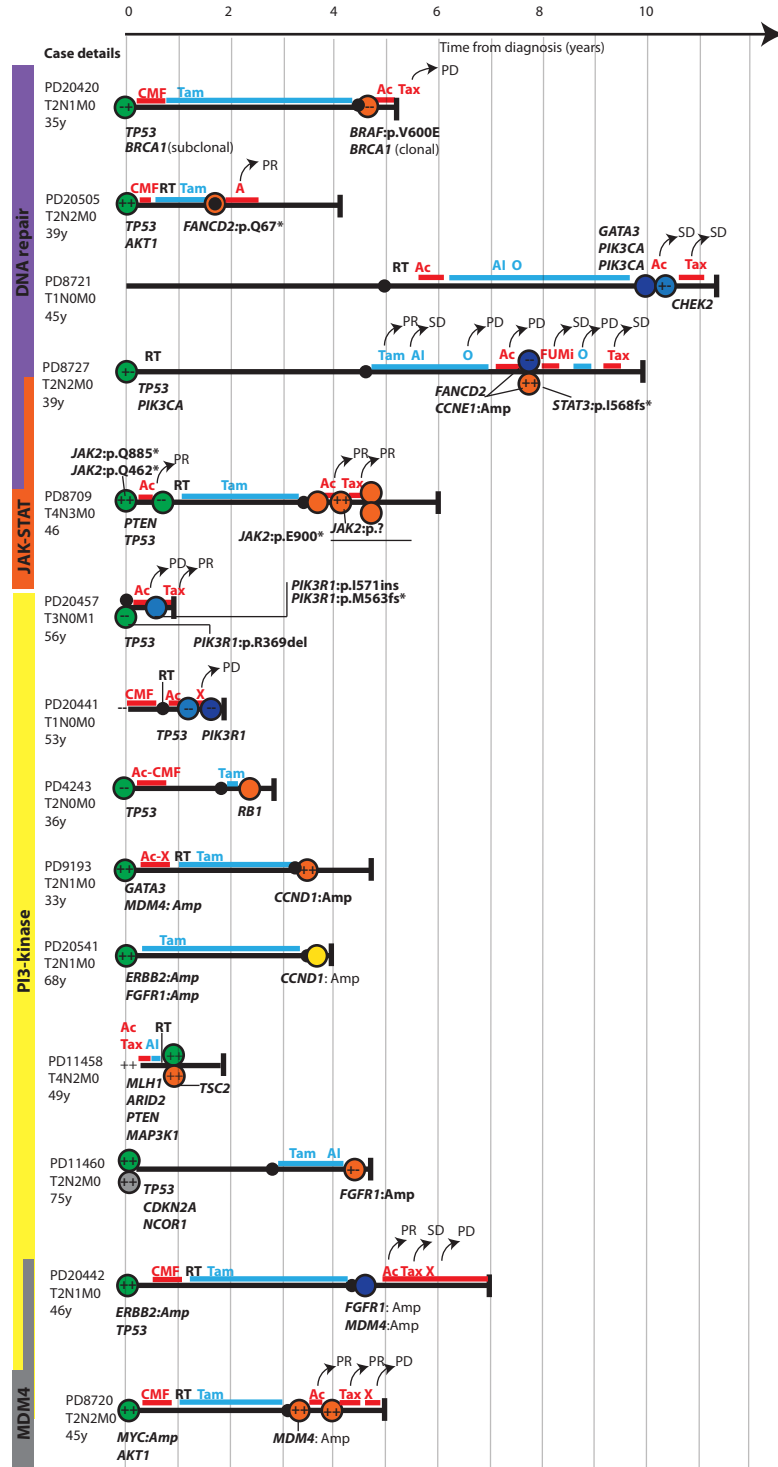

- First relapse
- 
- ER status**
- + Positive
  - Negative
- 
- Sample Type**
- Primary**
- Breast primary
  - Lymph node
- Local relapse**
- Breast/ chest wall
  - Lymph nodes/ axilla
- Distant metastasis**
- Visceral liver
  - Visceral other
  - Non-visceral
- 
- Treatment**
- RT Radiotherapy
- Chemotherapy**
- Tax Taxane
- Ac Anthracycline based
- CMF CMF
- X Capecitabine
- FUMi 5FU, Mitomycin C
- 
- Endocrine therapy**
- Tam Tamoxifen
- AI Aromatase inhibitor
- Ful Fulvestrant
- O other
- 
- Targeted therapy**
- Tras Trastuzumab

**Figure S5, related to Figure 6. Driver Alterations Arising Late in the Evolution of 26 Relapsed Breast Cancers.**

Clinical histories presented along a time line for 26 patients where a relapse specific driver mutation was identified within the scope of the 365 cancer gene panel. Patient ID, TNM stage and age at diagnosis are reported (left side). The extent of the black line, terminating in a vertical bar, indicates time from diagnosis to death. The black circle reflects first diagnosis of relapse. Each colored circle represents a sequenced sample. Driver mutations are annotated according to where they first appear in chronological time in relation to samples sequenced. Where available, individual sample estrogen and progesterone receptor status (respectively) are reported within relevant circles with variation between individual samples identified in 9 cases. Chronological treatment exposures are indicated by colored horizontal lines and annotating text. Treatment response is annotated where known (PR = partial response, PD = progressive disease, SD = stable disease, CR = complete response).

**A**

Approach 1  
(n=139)

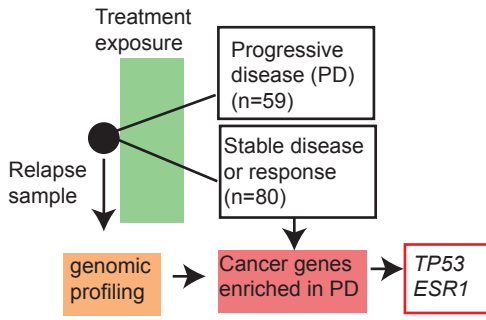

Approach 2  
(n=31)

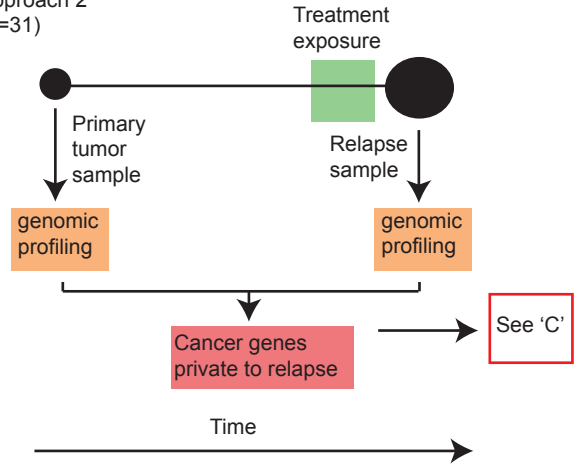

**B**

*TP53* mutations (n=43) in stable/ responsive disease

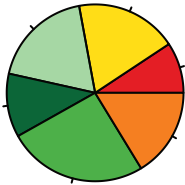

*TP53* mutations (n=42) in progressive disease

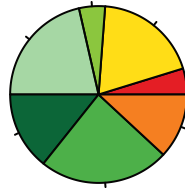

Possible Gain of function (GOF)

- High confidence GOF
- Lower confidence GOF
- Other missense
- Inframe indel

Truncating

- Nonsense
- Frameshift
- Essential splice

**C**

Primary cohort *TP53* mutations (n=252, 245 patients)

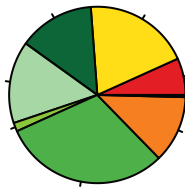

Relapse cohort *TP53* mutations (n=102, 95 patients)

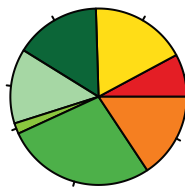

**D**

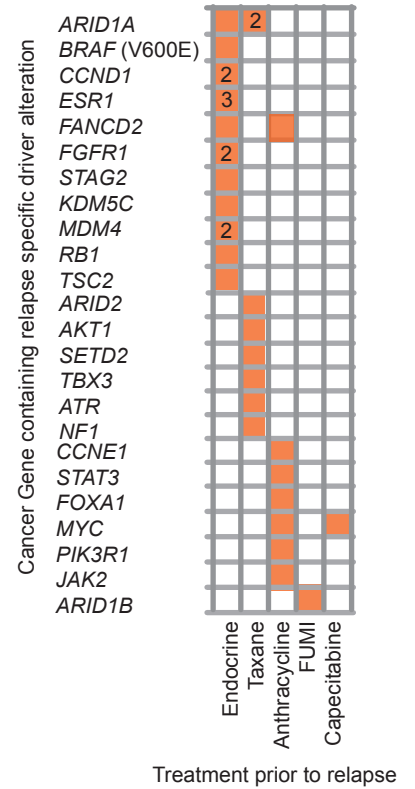



**Figure S6, related to Figure 6. Treatment Exposures in Relation to Breast Cancer Evolution.**

(A) Two approaches were used in the current study to identify potential associations between cancer genotype and treatment response. A total of 139 cases were identified that fulfilled the three criteria needed to perform 'Approach 1' that was designed to identify cancer genes that may be associated with disease progression through treatment. These criteria were: a) A sample from a relapsed breast cancer was obtained and sequenced, b) A documented treatment was administered shortly after this, and c) The best clinical response to the treatment was documented. *TP53* and *ESR1* were more frequently mutated in cancers that progressed rather than responded or stabilized after treatment (63% vs 45%,  $p = 0.04$  and 7% vs 0%,  $p = 0.03$  respectively, Fisher's exact test). These trends were observed for both genes on subgroup analysis of chemotherapy and endocrine therapy but statistical significance was not reached due to small sample sizes. A total of 31 cases permitted 'Approach 2' that was designed to identify driver mutations potentially arising de novo during a treatment exposure, i.e. those private to post-treatment samples. This approach required that a) Both primary tumor and a subsequent relapse site were sampled and sequenced and b) A documented systemic treatment intervention was performed immediately prior to the latter. Numbers in brackets refer to the number of sample-treatment-response cases.

(B) Distribution of *TP53* mutation types amongst cancers according to response to therapy. Gain of function mutations are taken from Petitjean et al., 2007. No enrichment for missense compared to nonsense mutations is seen amongst samples that progressed compared to those that did not ( $p=1.0$ , fisher's exact test). Numbers refer to the number of mutations.

(C) Distribution of *TP53* mutation types within the primary tumour (The Cancer Genome Atlas, TCGA) and relapse cohorts. Numbers refer to the number of mutations. *TP53* mutations were seen in 245/705 (35%) patients and 95/170 (56%) of patients in the primary and relapse cohorts respectively.

(D) Driver mutations private to post-treatment samples after exposure to a range of treatments. In 24/31 cases at least 1 new driver alteration (total = 33 alterations) not present in the primary tumour was detected in the relapse sample. Caution is needed in attributing mutations to specific exposures as these cancers were often exposed to multiple treatments prior to relapse.
